# Supplementary material
Source: PubMed Central journal article supplement (PMC7112287)
Supplement: mmc1.pdf [file mmc1.pdf]

**Cell**

**Supplemental Information**

## **Rational Design of an Epstein-Barr Virus**

### **Vaccine Targeting the Receptor-Binding Site**

**Masaru Kanekiyo, Wei Bu, M. Gordon Joyce, Geng Meng, James R.R. Whittle, Ulrich Baxa, Takuya Yamamoto, Sandeep Narpala, John-Paul Todd, Srinivas S. Rao, Adrian B. McDermott, Richard A. Koup, Michael G. Rossmann, John R. Mascola, Barney S. Graham, Jeffrey I. Cohen, Gary J. Nabel**

## Supplemental Experimental Procedures:

### *Gene synthesis and vector construction*

All genes used in the study were human codon optimized (GenScript). The gene encoding *Helicobacter pylori*-bullfrog hybrid ferritin was constructed by fusing residues 2-9 of bullfrog (*Rana catesbeiana*) ferritin lower subunit (UniProt: P07797 with a point mutation at residue 8 (N8Q) to abolish a potential *N*-glycosylation site) to *H. pylori* nonheme ferritin (UniProt: Q9ZLI1, residues 3-167) with mutation at residue 7 (I7E) to recapitulate the conserved salt bridge naturally found in human and bullfrog ferritins (6R and 14E in both human light chain and bullfrog lower subunit ferritins) with 6R of bullfrog ferritin. There is an additional mutation at residue 19 in *H. pylori* ferritin to abolish a potential *N*-glycosylation site. There were extra GS residues at the carboxyl terminus of *H. pylori* ferritin. The secreted encapsulin gene was constructed by fusing a human CD5 signal to *Termotoga maritima* encapsulin (UniProt: Q9WZP2, residues 1-264). The gene encoding EBV strain B95-8 gp350 (UniProt: P03200, residues 1-907) was synthesized and the fragments corresponding to ectodomain (residues 2-860), equivalent to the region used in the crystal structure (Szakonyi et al., 2006) (D<sub>2H60</sub>, residues 2-470), D<sub>123</sub> (residues 2-425) and D<sub>12</sub> (residues 2-317) were amplified with appropriate primers. These fragments were fused to downstream of a modified bovine prolactin signal sequence (bPRL: MDSKGSSQKG SRLLLLLLVVS NLLLPQGVLA) and upstream of the hybrid ferritin with a SG linker to give rise to the gp350-ferritin genes. To construct the gp350-encapsulin genes, gp350 fragments were fused to downstream of encapsulin with a (SG<sub>3</sub>)<sub>2</sub> linker. To construct soluble gp350 ectodomain and D<sub>123</sub>, the gene fragments were fused with bPRL and tagged with hexa-histidine at the end. The CR2BS mutant gp350s were made by site-directed mutagenesis (W162N and N164T for glyco162; and additional D208N and E210T for glyco

162/208 to introduce *N*-glycosylation sites at 162 and 208). All genes were then cloned into the CMV/R 8kb (VRC 8405) mammalian expression vector for protein production.

#### *Biosynthesis of recombinant proteins and purification*

The expression vectors were transiently transfected into FreeStyle 293F or Expi293F cells (Life Technologies) using 293fectin or ExpiFectamine 293 transfection reagents, respectively (Life Technologies). Four days after transfection, culture supernatants were harvested and cleared. The gp350-based nanoparticles were purified by affinity chromatography using *Galanthus nivalis* agglutinin (GNA, snowdrop lectin) resins (EY Laboratories) followed by size exclusion chromatography with a HiPrep 16/60 Sephacryl S-500 HR column (GE Healthcare) in PBS. The soluble gp350 proteins were purified using Ni sepharose excel resin (GE Healthcare) followed by size exclusion chromatography with a Superdex 200 10/300 GL (GE Healthcare) in PBS.

#### *ELISA*

For antigenic characterization, purified nanoparticle and soluble gp350 proteins (25 nM) were coated ( $100 \mu\text{l well}^{-1}$ ) onto MaxiSorp plates (Nunc) and the wells were probed with anti-gp350 (72A1 and 2L10) or anti-influenza (C179, isotype control) mAbs followed by peroxidase-conjugated secondary antibody (SouthernBiotech). For serum analyses, the plates were coated with gp350 ectodomain at  $0.2 \mu\text{g well}^{-1}$  and probed with serially diluted sera.

#### *Immunoprecipitation*

MAbs 72A1, 2L10 and C179 ( $5 \mu\text{g}$ ) were incubated with purified nanoparticles ( $5 \mu\text{g}$ ) at ambient temperature for 30 minutes. Protein G Dynabeads (Life Technologies) were then added and incubated for another 30 minutes. Immune complexes were separated, washed and eluted in Laemmli buffer containing reducing agent. Half of each reaction was analyzed by SDS-PAGE followed by InstantBlue staining (Expedeon).

### *Electron microscopy (EM)*

For negative stain EM analysis, samples of about  $50 \mu\text{g ml}^{-1}$  were adsorbed to freshly glow-discharged carbon-coated grids, rinsed with PBS, and stained with 2% ammonium molybdate (pH 7.0). Images were recorded on an FEI T20 microscope with an Eagle CCD camera.

### *Cryo-EM reconstruction*

The gp350 D<sub>123</sub>-nanoparticles ( $5 \mu\text{g } \mu\text{l}^{-1}$ ,  $3 \mu\text{l}$ ) were applied to holey grids (Quantifoil) and fast-frozen in liquid ethane as described previously (Meng et al., 2013). Cryo-EM images of the D<sub>123</sub>-ferritin and D<sub>123</sub>-encapsulin were acquired on an FEI Titan Krios operated at 300 keV and a CM200 FEG microscope operated at 200 keV, respectively. The electron dose for data collection was  $\sim 20 \text{ e}^{-}/\text{\AA}^2$ , and the image was defocused by  $\sim 2\text{-}3 \mu\text{m}$ . The defocus and the astigmatism of each micrograph were estimated with the program EMAN1 fitctf and further confirmed with the ctfit. Image processing and three-dimensional reconstruction were performed using about 1,000 particles with the EMAN suite of programs (Baker et al., 2010). The final reconstruction was computed and was low-pass filtered to 30 Å in resolution. The EM density of the gp350 in the D<sub>123</sub>-ferritin was extracted from the difference map between the D<sub>123</sub>-ferritin and native ferritin using the UCSF Chimera package. The fit model was made using the EMFit program (Rossmann et al., 2001).

### *Immunization*

Animal experiments were carried out in accordance with all federal regulations and NIH guidelines and approved by the Institutional Animal Care and Use Committee. Eight- to 10-week old female BALB/c mice (Charles River Laboratories) were immunized ( $n = 5$ ) intramuscularly with 5 or  $0.5 \mu\text{g}$  of purified proteins in  $100 \mu\text{l}$  of 50% (v/v) mixture of SAS adjuvant (Sigma) in PBS at weeks 0, 3 and 16. Sera were collected prior to the first dose and periodically after

immunization. For the non-human primate study, 12 cynomolgus macaques (*Macaca fascicularis*) ( $5.6 \pm 1.0$  years old,  $5.3 \pm 1.8$  kilograms, 5 males and 3 females) were divided into 3 groups. Monkeys received  $50 \mu\text{g}$  of gp350 ectodomain,  $25 \mu\text{g}$  of gp350 D<sub>123</sub>-ferritin or D<sub>123</sub>-encapsulin in SAS adjuvant (total volume of 1.0 ml) intramuscularly in the quadriceps at weeks 0, 4 and 12. Blood samples were collected prior to the first dose and weeks 6, 8 and 14. Plasma was used for neutralization assays.

#### *LIPS assay*

The detailed method of gp350 LIPS assay was described previously (Sashihara et al., 2009). Briefly, a fusion protein composed of gp350 and *Renilla* luciferase was incubated with sera for 1 hour at ambient temperature and immunoprecipitated using protein A/G beads (Thermo Scientific). After washing, coelenterazine substrate (Promega) was added and luminescence was counted on a Centro LB 960 Luminometer (Berthold Technologies).

#### *Cell culture*

Raji (human Burkitt lymphoma) cells were propagated in RPMI 1640 with complete supplements (10% fetal bovine serum,  $100 \text{ U ml}^{-1}$  of penicillin,  $100 \mu\text{g ml}^{-1}$  of streptomycin, and 2 mM L-glutamine). 293/2089 cells (Delecluse et al., 1998) that contain GFP-reporter EBV (B95-8/F) genome were grown in DMEM with complete supplements and hygromycin at  $50 \mu\text{M}$ .

#### *GFP-reporter virus neutralization assay*

Neutralization of EBV to B cells has been described previously (Sashihara et al., 2009). Briefly, immune sera were serially diluted and incubated with B95-8/F reporter virus for 2 hours. For protein competition neutralization, sera were incubated with either soluble gp350 WT or glyc162/208 mutant protein ( $25 \mu\text{g ml}^{-1}$ ) at ambient temperature for 30 minutes prior to mixing with virus. The mixture was added to Raji cells and incubated for 3 days. Cells were fixed in 2%

paraformaldehyde and analyzed with an Accuri C6 flow cytometer (BD Biosciences). The percentage of GFP<sup>+</sup> cells was quantified using BD CSampler software (BD Biosciences).

Neutralization antibody titers were expressed as the concentration of serum antibody needed to inhibit viral entry by 50% (IC<sub>50</sub>) calculated using controls lacking either virus (0%) or serum (100%).

#### *Recombinant vaccinia virus challenge*

Full length EBV gp350 was cloned into pRB21, a plasmid encoding vaccinia virus (VV) vp37 which is required for plaque formation (Blasco and Moss, 1995). BSC-1 cells were infected with VV vRB12 ( $\Delta$  vp37) and subsequently transfected with pRB21 containing EBV gp350.

Recombinant virus (rVV-gp350) was rescued and purified by three rounds of plaque purification. Expression of gp350 was confirmed by surface staining of infected cells with mAb 72A1.

Challenge stock was purified on a cushion of 36% sucrose by ultracentrifugation ( $32,900 \times g$ , 80 min) and titrated in BSC-1 cells. The challenge dose was determined in a pilot experiment using  $1 \times 10^5 - 1 \times 10^7$  PFU of virus in naïve animals. Immunized mice were challenged intranasally with  $1 \times 10^6$  PFU of virus ( $10 \mu\text{l}$  per nostril). Mice were weighed daily after challenge and euthanized when they lost  $\geq 30\%$  of their pre-challenge weight or suffered symptoms.

#### *Surface Plasmon Resonance-based antibody competition*

Soluble gp350 WT protein was immobilized on a CM5 sensor chip (GE Healthcare) through amine coupling at pH 4.5. Fifty microliters ( $100 \mu\text{g ml}^{-1}$ ) of mAb (72A1, 2L10 or C179) were then flowed over the chip at  $30 \mu\text{l min}^{-1}$  before injecting  $50 \mu\text{l}$  of the serum samples (1/50 dilution) at  $30 \mu\text{l ml}^{-1}$  on a Biacore 3000 instrument (GE Healthcare). The chip was regenerated by two injections ( $50 \mu\text{l}$ ) of 3M MgCl<sub>2</sub> after each run. Percent inhibition (PI) of serum antibodies

to bind gp350 by 72A1 or 2L10 was calculated by an equation:  $PI = 100 - [(maximum\ RU\ of\ 72A1\text{- or } 2L10\text{-saturated curve} / maximum\ RU\ of\ C179\text{-saturated curve}) \times 100]$ .

*Statistical analysis*

P values were generated by one-way ANOVA using the Prism 5 program (GraphPad Software)

## Supplemental References:

Baker, M.L., Zhang, J., Ludtke, S.J., and Chiu, W. (2010). Cryo-EM of macromolecular assemblies at near-atomic resolution. *Nature protocols* 5, 1697-1708.

Blasco, R., and Moss, B. (1995). Selection of recombinant vaccinia viruses on the basis of plaque formation. *Gene* 158, 157-162.

Delecluse, H.J., Hilsendegen, T., Pich, D., Zeidler, R., and Hammerschmidt, W. (1998). Propagation and recovery of intact, infectious Epstein-Barr virus from prokaryotic to human cells. *Proceedings of the National Academy of Sciences of the United States of America* 95, 8245-8250.

Meng, G., Zhang, X., Plevka, P., Yu, Q., Tijssen, P., and Rossmann, M.G. (2013). The structure and host entry of an invertebrate parvovirus. *Journal of virology* 87, 12523-12530.

Rossmann, M.G., Bernal, R., and Pletnev, S.V. (2001). Combining electron microscopic with x-ray crystallographic structures. *Journal of structural biology* 136, 190-200.

Sashihara, J., Burbelo, P.D., Savoldo, B., Pierson, T.C., and Cohen, J.I. (2009). Human antibody titers to Epstein-Barr Virus (EBV) gp350 correlate with neutralization of infectivity better than antibody titers to EBV gp42 using a rapid flow cytometry-based EBV neutralization assay. *Virology* 391, 249-256.

Szakonyi, G., Klein, M.G., Hannan, J.P., Young, K.A., Ma, R.Z., Asokan, R., Holers, V.M., and Chen, X.S. (2006). Structure of the Epstein-Barr virus major envelope glycoprotein. *Nature structural & molecular biology* 13, 996-1001.
